# Supplementary material for: Well-defined silver conductive pattern fabricated on polyester fabric by screen printing a dopamine surface modifier followed by electroless plating
Source: Royal Society of Chemistry journal article supplement (doi:10.1039/c7sm02246h), 2018-01-01
Supplement: c7sm02246h1.pdf [file c7sm02246h1.pdf]

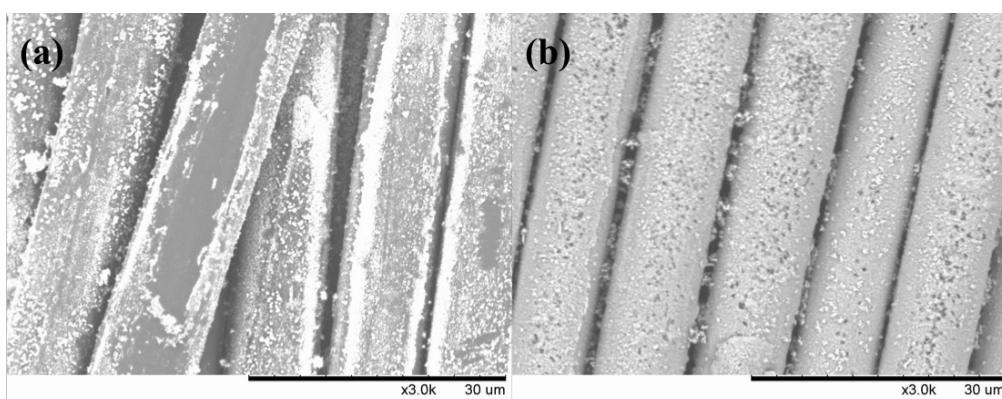

**Fig. S1** SEM images of (a) PDA-PET/Ag fabric without immersing in the metal salt solution for activation and (b) PDA-PET/Ag fabric with immersing in the metal salt solution for activation.

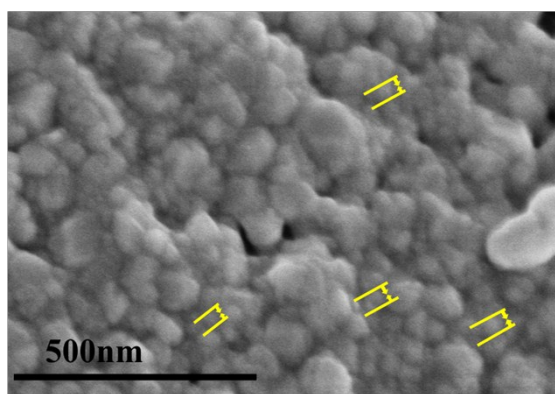

**Fig. S2** SEM images of PET-PDA/Ag fabric
